# Supplementary material for: Investigating the potential of N-methylglucamine modified cellulose microspheres for Sb(iii) and Sb(v) removal from actual mine inflow
Source: Royal Society of Chemistry journal article supplement (doi:10.1039/d4nj04913f), 2025-01-01
Supplement: d4nj04913f1.pdf [file d4nj04913f1.pdf]

Supplementary material for

**Investigating the potential of N-methylglucamine modified  
cellulose microspheres for Sb(III) and Sb(V) removal from  
actual mine inflow**

*Jiangtao Yu*<sup>2</sup>, *Wenkang Li*<sup>3</sup>, *Fan Yang*<sup>1</sup>, *Yi Yang*<sup>1</sup>, *Juntao Yan*<sup>1</sup>, *Deng Ding*<sup>1</sup>,  
*Manman Zhang*<sup>1\*</sup>, *Xueyan Que*<sup>2\*</sup>, *Long Zhao*<sup>3\*</sup>

<sup>1</sup> School of Chemical and Environmental Engineering, Wuhan Polytechnic University,  
Wuhan 430040, China.

<sup>2</sup> Yangling Hesheng Irradiation Technologies Co., Ltd, Yangling, 712000, China.

<sup>3</sup> State Key Laboratory of Advanced Electromagnetic Engineering and Technology,  
School of Electrical and Electronic Engineering, Huazhong University of Science and  
Technology, Wuhan 430074, China.

\*Corresponding author at: School of Electrical and Electronic Engineering, Huazhong  
University of Science and Technology, Wuhan 430074, China (Long Zhao), E-mail  
address: [zhaolong@hust.edu.cn](mailto:zhaolong@hust.edu.cn); [ryuuchou@hotmail.com](mailto:ryuuchou@hotmail.com).

Text S1:

Specifically, 5.0 g Celp sealed in polyethylene bag was purged with nitrogen gas for 3 min. The samples were irradiated at dose of 30 kGy by EB accelerator (1MeV, 10 kGy/pass) under the cooling of dry-ice, followed by injecting 50 mL GMA emulsion solution (30 % GMA, 3 % surfactant Tween 20) into the sample bag. Subsequently, the mixture was placed in a water bath at 50 °C for 2 h. The resulting product was labelled as Celp-g-GMA and purified from copolymer and unreacted monomer using acetone and ultrapure water. And the grafted polymers Celp-g-GMA were desiccated in vacuum at 60 °C.

The equations for PFO and PSO models (Eq.S1- Eq.S2) are presented as follows:

$$q_t = q_e(1 - e^{-k_1 t}) \quad (S1)$$

$$\frac{t}{q_t} = \frac{1}{k_2 q_e^2} + \frac{t}{q_e} \quad (S2)$$

where  $k_1$  ( $h^{-1}$ ) and  $k_2$  ( $h^{-1} g \text{ mg}^{-1}$ ) were rate constant for PFO and the PSO model, respectively.  $q_e$  (mg/g) and  $q_t$  (mg/g) represented the amounts of Sb adsorbed per gram adsorbent at equilibrium and at time  $t$  (h), respectively.

The isotherm data for the capture of Sb(III) and Sb(V) by Celp-g-GMA-NMG were fitted using the Langmuir (Eq. S3) and Freundlich models (Eq. S4).

$$C_e / Q_e = C_e / Q_m + 1 / (K_L \times Q_m) \quad (S3)$$

$$\ln Q_e = \ln K_F + \frac{1}{n} \ln C_e \quad (S4)$$

where the equilibrium concentration and adsorption capacity of Sb are denoted by  $C_e$  (mg/L) and  $Q_e$  (mg/g).  $Q_m$  (mg/g) is the theoretical maximum adsorption capacity of Sb on Celp-g-GMA-NMG. The Langmuir and Freundlich constants are expressed by  $K_L$  (L/mol) and  $K_F$  ((mg/g)/(L/mg)<sup>1/n</sup>), respectively. The Freundlich exponent ( $n$ ) represents the adsorption intensity.

The thermodynamic data for the adsorption of Sb(III) and Sb(V) onto Celp-g-GMA-NMG were fitted using Eq. (S5) and Eq. (S6).

$$\lg K_d = \frac{-\Delta H}{2.303RT} + \frac{\Delta S}{2.303R} \quad (S5)$$

$$\Delta G = \Delta H - T\Delta S \quad (S6)$$

where  $\Delta G$  (kJ/mol),  $\Delta S$  (J/mol), and  $\Delta H$  (kJ/mol) were Gibbs free energy, entropy and enthalpy, respectively.  $R$  was the molar gas constant (8.314 J/mol K) and  $T$  (K) represented the adsorption absolute temperature.

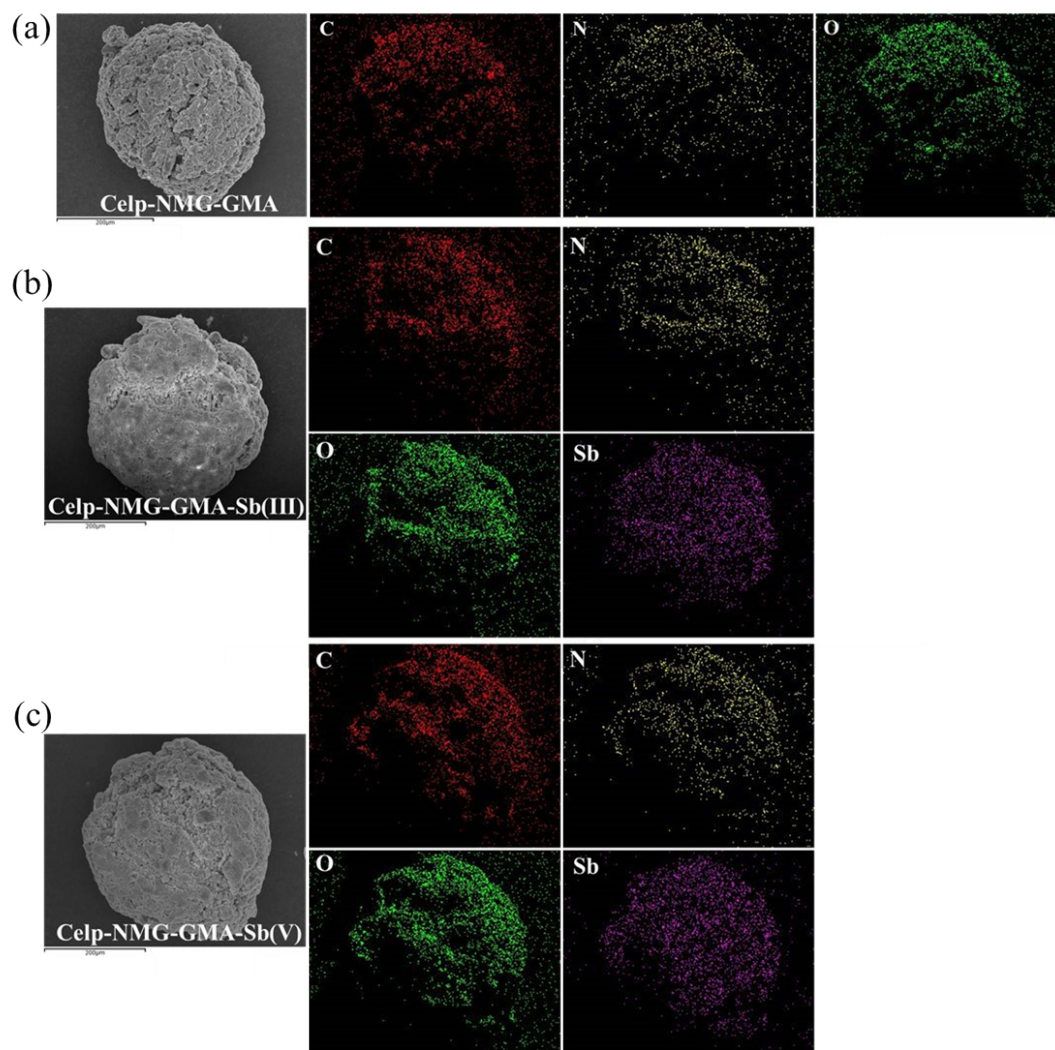

Fig. S1 SEM and elemental mapping images of Celp-g-GMA-NMG before and after adsorption.

Table S1 Kinetic parameter of Sb(III/V) individual adsorption onto Celp-g-GMA-NMG.

| Parameter                                                   | Sb(III) | Sb(V)   |
|-------------------------------------------------------------|---------|---------|
| $q_{e,exp} / (\text{mg} \cdot \text{g}^{-1})$               | 10.26   | 11.74   |
| $t_e / (\text{h})$                                          | 6       | 1.5     |
| Pseudo-first order model                                    |         |         |
| $q_{e,est} / (\text{mg} \cdot \text{g}^{-1})$               | 9.4048  | 9.4048  |
| $k_1 / (\text{h}^{-1})$                                     | 0.1031  | 0.0832  |
| $R^2$                                                       | 0.9214  | 0.9606  |
| $R^2_{adj}$                                                 | 0.9127  | 0.9550  |
| $\chi^2_{red}$                                              | 0.6128  | 0.1197  |
| RSS                                                         | 5.5150  | 0.8382  |
| Pseudo-second order model                                   |         |         |
| $q_{e,est} / (\text{mg} \cdot \text{g}^{-1})$               | 10.1926 | 11.5340 |
| $k_2 / (\text{g} \cdot \text{mg}^{-1} \cdot \text{h}^{-1})$ | 0.0103  | 0.0152  |
| $R^2$                                                       | 0.9999  | 0.9998  |
| $R^2_{adj}$                                                 | 0.9998  | 0.9998  |
| RSS                                                         | 1.8384  | 0.8048  |

$k_1$  and  $k_2$ : Adsorption kinetic rate constants of Pseudo-first order and Pseudo-second order models, respectively;

$R^2$ : correlation coefficient;

$R^2_{adj}$ : adjusted  $R^2$ ;

$\chi^2_{red}$ : Reduced chi-square;

RRS: Residual Sum of Squares.

Table S2 Isotherm parameter of Sb(III/V) individual adsorption onto Celp-g-GMA-NMG.

| Parameter                                     | Sb(III)   | Sb(V)    |
|-----------------------------------------------|-----------|----------|
| Langmuir model                                |           |          |
| $q_{e,est} / (\text{mg} \cdot \text{g}^{-1})$ | 217.61    | 49.11    |
| $k_L / (\text{L} \cdot \text{mg}^{-1})$       | 0.1505    | 3.7466   |
| $R^2$                                         | 0.9827    | 0.9639   |
| $R^2_{adj}$                                   | 0.9802    | 0.9567   |
| $\chi^2_{red}$                                | 135.5199  | 18.5917  |
| RSS                                           | 948.6390  | 92.9585  |
| Freundlich model                              |           |          |
| n                                             | 4.2676    | 6.3154   |
| $k_F / (\text{mg/g})/(\text{L/mg})^{1/n}$     | 62.7840   | 23.2958  |
| $R^2$                                         | 0.9592    | 0.90502  |
| $R^2_{adj}$                                   | 0.9533    | 0.88602  |
| $\chi^2_{red}$                                | 319.6012  | 48.9039  |
| RSS                                           | 2237.2086 | 244.5196 |

$K_L$ : the Langmuir constant;

$K_F$  and n: the Freundlich adsorption coefficient and constant, respectively;

$R^2$ : correlation coefficient;

$R^2_{adj}$ : adjusted  $R^2$ ;

$\chi^2_{red}$ : Reduced chi-square;

RRS: Residual Sum of Squares.

Table S3 Calculated thermodynamic parameters of Celp-g-GMA-NMG.

|         | $\Delta H$ (kJ/mol) | $\Delta S$ (J/mol) | T (K) | $\Delta G$ (kJ/mol) | $R^2$  |
|---------|---------------------|--------------------|-------|---------------------|--------|
| Sb(III) | 24.21               | 103.94             | 298   | -6.7382             | 0.9949 |
|         |                     |                    | 303   | -7.3169             |        |
|         |                     |                    | 308   | -7.8228             |        |
|         |                     |                    | 313   | -8.2998             |        |
|         |                     |                    | 298   | -11.1119            |        |
| Sb(V)   | 44.32               | 185.91             | 303   | -11.9704            | 0.9982 |
|         |                     |                    | 308   | -12.9302            |        |
|         |                     |                    | 313   | -13.8929            |        |

Table S4 The main composition of actual mine inflow.

| Composition | Concentration(mg/L) | Composition | Concentration(mg/L) |
|-------------|---------------------|-------------|---------------------|
| Ca          | 147.40              | As          | 18.20               |
| Sb          | 10.16               | Si          | 9.07                |
| Sr          | 0.21                | Mg          | 46.80               |
